# Supplementary material for: A novel lipase with dual localisation in Trypanosoma brucei
Source: PubMed Central journal article supplement (PMC8934347; doi:10.1038/s41598-022-08546-w), 2022-03-19
Supplement: 41598_2022_8546_MOESM1_ESM.pdf [file 41598_2022_8546_MOESM1_ESM.pdf]

A

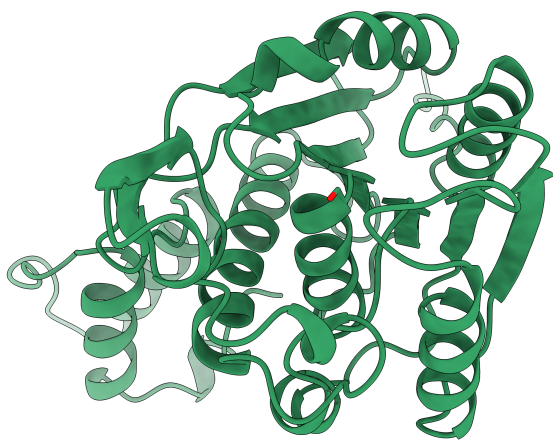

B

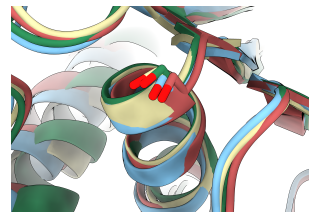

Fig S1

A

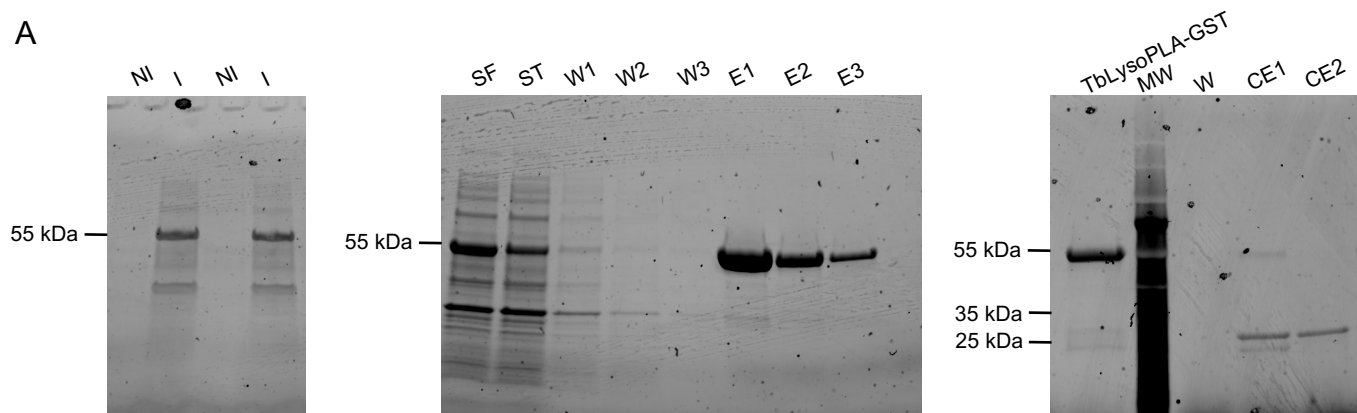

B

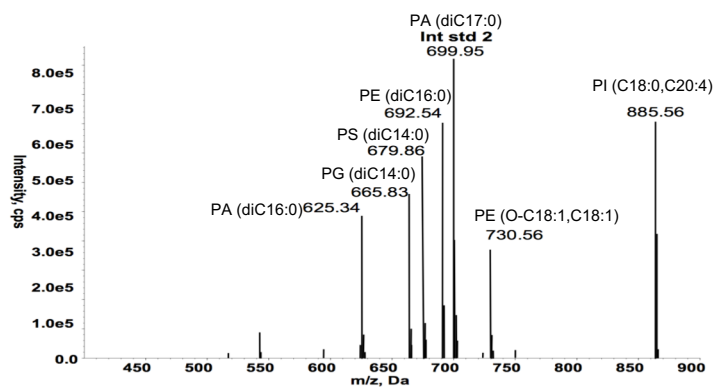

C

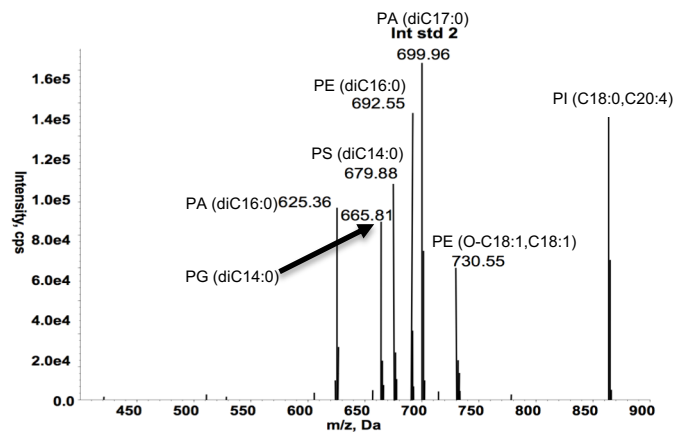

Fig S2

A

```

TbLysoPLA -----MFGTPV-----ENLTANQI KEELRTL YGVSDVSGCIEQKDLQEKLEKTRETETLI THGLKYGPLLQI GNRQSPSGI VTLTHGLGDSANGWESVAVELSRRL ---PHL--LF--LLP--
TbPLA1 -----MS-----ESVDQLKTYLQSCDYSDSS-----R-----KKALEM--SOLCCHVYGGEGHLPDGLVCTREVGLKKRDESCGFRSELYTNG
TcPLA1 -----MRRR-----RTM-----TVVVVIL-----LILCGEDVRADYSVRLAT-----R-----ALYAKAAAYCKAEAISW--TCVSGASN-----PGMQ-----KVRVFTNA
LbrPLA1 MSIAITLERRMPQLHSCALCVTL LLSLMMLLAFFLFTSLTKKSESIISNTASLDYNTTEGR-----K-----ALYFKSAAYCPVKSVEW--NGGSACSN-----ATPNFR-----VFNVYDNT
Consensus -----MRR-----TV-----P-----E-----LLEERDYV-----S-----K-----ALYKAYCPKKEW-----C-----CSGSGSNGG-----GW-----EPG-----FLYTN
MSIAITM+RRMPQLHSC+++CVTT+V+M++++P+FTSLE++++LLI+E++++DYSV+++SGCIEQKDLQEKLEKTRETALY++K+AYCP+K+I+EWQS+CGSC+SN+G+G++++GW+++++E+PG++KRD+++GF+F+YTN+
TbLysoPLA -----TASMQPVGINSGAVMNSWYDIRNV-----SSGNGVTEDA--EAIIMSANLYKSLAYTASRRYQVPAGRVVYAGFSGQAVISLAAGLTARIPAGVAALSGYFAAAEKILPQLCNKSLPVLCHGTMNDIIP
TbPLA1 -----SKYVLAFAAGVHDNRSAFES-----ALQLVQKSDA-----YKLAANAALVVSAGFLSNVSGFTGHSGLGGGLATAAVFTGAP--AI-----TFNPAWLSST-----
TcPLA1 KHSTQAFVGVNN--SMIVVSRGTVDLNNWLYDLDFIPVPI RDGCV-GCLVHAGFHCESLWAE--RGYLOELVAGKIEGILITGHSLGGAMANIAANLMSQ--N-----
LbrPLA1 STGNFGYSGIDNDAGRIVVVRGTHNTENWIQDLDFWISIPYPNPSCGNCR IHRGFYRAYSSVRYQL-IYDVL SMLERHPSYTLFI TGHSLGGAMALLAIDFATW--NV-----SK-PEVVDNSV
Consensus -----GNSASVWFAG-----GTHDNNWDLDF-----PY-----SCNGCLHAGFA-----S-----Y-----L-----AYASV-----G-----V-----TGSLGG-----AA-----AA-----P-----S
+++++++G+N+ASMI VV+FRGTHD+N+W+DLDF+++PY+++SCNGCL+HAGF++A++S++Y+L++AY+AS+V+++++V+ITGHSLGGAMALAAA+++++PANVAALSGYFAAAE+++P+++++S+PVLCHGTMNDIIP
TbLysoPLA FSAAEKTKETLESLVGVPVTLVSYPM-----EMSHPK--EINDL-----E-----ASDLAASSLHED--VM-----
TbPLA1 -----RSELLKFPSEVINIYFAEALDVFQRHPQLLNSVPAGAF FAGLSNSKIQQFGTFKYIYCKVIHDPHPYIDAHL--IETIIEELRKENGEKIS-----ASDLAASSLHED--VM-----
TcPLA1 -----PLFPGAPKVLTYTFGQ-----PRVG-----NEAFANWLLAS--FCRDGHESYRVTHKRDVPHLLPMLFGFYHAPNEVWYDNDGDTVHKNCDTIFGTPCSALTAEDEPNCSDSIVSTSI EDHLKYLGVCTRCSC
LbrPLA1 -----QPSSAAPKPSHLAPVMLTYFGE-----PRVG-----NQYFTNWSTSV-LA--NEKQFRITHAKDVPVPHLPPLSWSYVHPQEVWYPADAEAVL-----LCQDNSTEDPLCSNSVYATRVADHLIYFGICTRCEC
Consensus -----SE LKFPQV-----V-----LYFGE-----P-----RVG-----N-----FANWLL-----S-----G-----YR-----H-----DPVPHLP-----L-----H-----P-----E-----VWY-----DC-----E-----V-----C-----EDP-----CS-----S-----ATS-----DHL-----Y-----G-----CTRC-----C
FSA++++SE++KFPGV+PV+LYTFGEALDVFQRHPRVGNVSPAN++FANWLL++SK++++G++++YR+TH+++VPVHLP+L+++++H+P+EVWY++DGE+V+KNCTDIFGT+C+++++EDP+CS+S++ATS++DHL+Y+G+CTRC+C
TbLysoPLA -----KFLQQVLPGPS-----KS--
TbPLA1 -----GGMAQLVQQKMSVIME-V--VASVMSKQFSAGGFGS-----S-----
TcPLA1 DPGEAMSDEELRLEPELERVVAMDYIYQQRNMRFRPPF PARHRES
LbrPLA1 TAAEMEEIYKYKLPPEYTSLLALDYVMNRSRPTVR-----
Consensus -----GEM-----OQKLP-----PE-----E-----V-----A-----DYVM-----SR-----RF-----
++GEM+++++OQKLPPE+E+V+A+DYVM++SR+++RF+++FPA++++ES

```

B

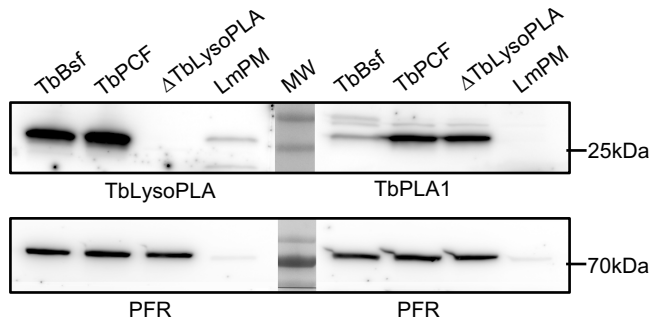

Fig S3

A

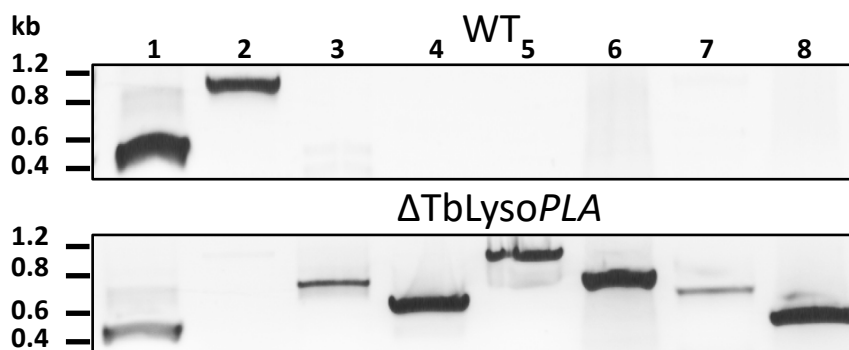

B

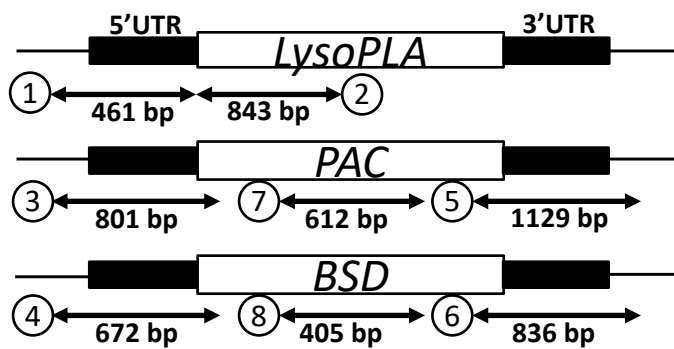

Fig S4

|            | TbLysoPLA | TbgLysoPLA | TevLysoPLA | TcoLysoPLA | TviLysoPLA | TcrLysoPLA | LmLysoPLA |
|------------|-----------|------------|------------|------------|------------|------------|-----------|
| TbLysoPLA  | 100       |            |            |            |            |            |           |
| TbgLysoPLA | 99.64     | 100        |            |            |            |            |           |
| TevLysoPLA | 99.64     | 99.64      | 100        |            |            |            |           |
| TcoLysoPLA | 70.61     | 70.61      | 70.61      | 100        |            |            |           |
| TviLysoPLA | 52.17     | 52.17      | 52.17      | 51.19      | 100        |            |           |
| TcrLysoPLA | 62.86     | 62.50      | 62.50      | 63.44      | 54.33      | 100        |           |
| LmLysoPLA  | 53.82     | 53.82      | 53.82      | 53.28      | 43.60      | 57.61      | 100       |

Table S1

|           | TbLysoPLA | TbPLA1a | TcrPLA1 | LbrPLA |
|-----------|-----------|---------|---------|--------|
| TblysoPLA | 100       |         |         |        |
| TbPLA1a   | 16.06     | 100     |         |        |
| TcrPLA1   | 16.29     | 20.83   | 100     |        |
| LbrPLA    | 18.27     | 17.25   | 37.50   | 100    |

Table S2

| Name                | Sequence                                                                            | Purpose                           |
|---------------------|-------------------------------------------------------------------------------------|-----------------------------------|
| PLA1bpGEXfw         | AGCT <b>CGAG</b> ATGTTTGGCACGCCGGTTGAGAAT                                           | Heterologous expression in E.coli |
| PLA1bpGEXfw         | AGG <b>CGGCCGCTT</b> ACGATTTTCGATGAAGGTCCGGG                                        |                                   |
| PLA1bMDfw           | TGCCGATTTCGCGCAAGGTGC                                                               |                                   |
| PLA1bMDrev          | GCACCTTGCGCGAATCCGGCA                                                               |                                   |
| PLA1bRNAisens5p     | GCA <b>AGCTT</b> ATGTTTGGCACGCCGGTTGA                                               | Interference RNA                  |
| PLA1bRNAisens3p     | GC <b>CTCGAGT</b> ACTCCATTCCTGAGCTCA                                                |                                   |
| PLA1bRNAiantisens5p | GCA <b>AGCTT</b> GAA <b>CTCGAG</b> AGACTTTTGAGGTAATTGGC                             |                                   |
| PLA1bRNAiantisens3p | G <b>CTCTAGA</b> ATGTTTGGCACGCCGGTTGA                                               |                                   |
| PLA1b5UTRfw         | GTTGTG <b>CCATGG</b> GTGCC <b>ATTA</b> ACTCAACTAT                                   | Knock-out                         |
| PLA1b5UTRrev        | CAACCG <b>GAATTC</b> CAAACATT <b>CTAG</b> ACAACCTTTCAGTGAGGTTTCGTAATG               |                                   |
| PLA1b3UTRfw         | CCTTCAT <b>CTAGAT</b> CGTAA <b>CTCGAGT</b> GGAGTTGTAAGAAAGAGAGGTGAATG               |                                   |
| PLA1b3UTRrev        | AACGG <b>GCCTT</b> ATAAT <b>GCAA</b> ACGTGTTTGGTGCTTGCTCCTACGGC                     |                                   |
| PLA1bTyNterfw       | GCA <b>AGCTT</b> ATGGAGGTCCATACTA <b>ACCA</b> AGATCCACTTGACGCCTTTGGCACGCCGGTTGAGAAT | Expression in Trypanosomes        |
| PLA1bTyNterrev      | GC <b>CTCGAGT</b> TACGATTTTCGATGAAGGTCCGGG                                          |                                   |
| PLA1bnoSKSrev       | GC <b>CTCGAGT</b> TATGAAGGTCCGGGGAGGACTTGCT                                         |                                   |
| PLA1bSKLrev         | GC <b>CTCGAGT</b> TACAATTTTCGATGAAGGTC                                              |                                   |

In **bold**: restriction sites for cloning

Underlined: sequence TY tag

*Italic*: change to create a mutation

Table S3
